# Supplementary material for: Soluble RANKL expression in Lactococcus lactis and investigation of its potential as an oral vaccine adjuvant
Source: PubMed Central journal article supplement (PMC4659156; doi:10.1186/s12865-015-0132-x), 2015-11-25
Supplement: 12865_2015_132_MOESM1_ESM.pdf [file 12865_2015_132_MOESM1_ESM.pdf]

# Supplementary information

## Soluble RANKL expression in *Lactococcus lactis* and investigation for its potential as an oral vaccine adjuvant

Jeong-In Kim<sup>1,#</sup>, Tae-Eun Park<sup>1,#</sup>, Sushila Maharjan<sup>1</sup>, Hui-Shan Li<sup>1</sup>, Ho-Bin Lee<sup>1</sup>, In-Seon Kim<sup>1</sup>, Dachuan Piao<sup>1</sup>, Jun-Yeong Lee<sup>1</sup>, Chong-Su Cho<sup>1</sup>, Jin-Duck Bok<sup>2</sup>, Zhong-Shan Hong<sup>3</sup>, Sang-Kee Kang<sup>2\*</sup>, Yun-Jaie Choi<sup>1,3\*</sup>

<sup>1</sup>Department of Agricultural Biotechnology & Research Institute for Agriculture and Life Sciences, Seoul National University, Seoul, South Korea; <sup>2</sup>Institute of Green-Bio Science & Technology, Seoul National University, Pyeongchanggun, Gangwondo, South Korea; <sup>3</sup>Department of Animal Science, Tianjin Agricultural University, Tianjin, China<sup>#</sup> Jeong-In Kim and Tae-Eun Park contributed equally to this work

Sang-Kee Kang; Tel.: +82-33-339-5731; Fax : +82-33-339-5732; E-mail : kangsk01@snu.ac.kr

Yun-Jaie Choi; Tel.: +82-2-880-4807; Fax : +82-2-875-7340; E-mail : cyjcow@snu.ac.kr

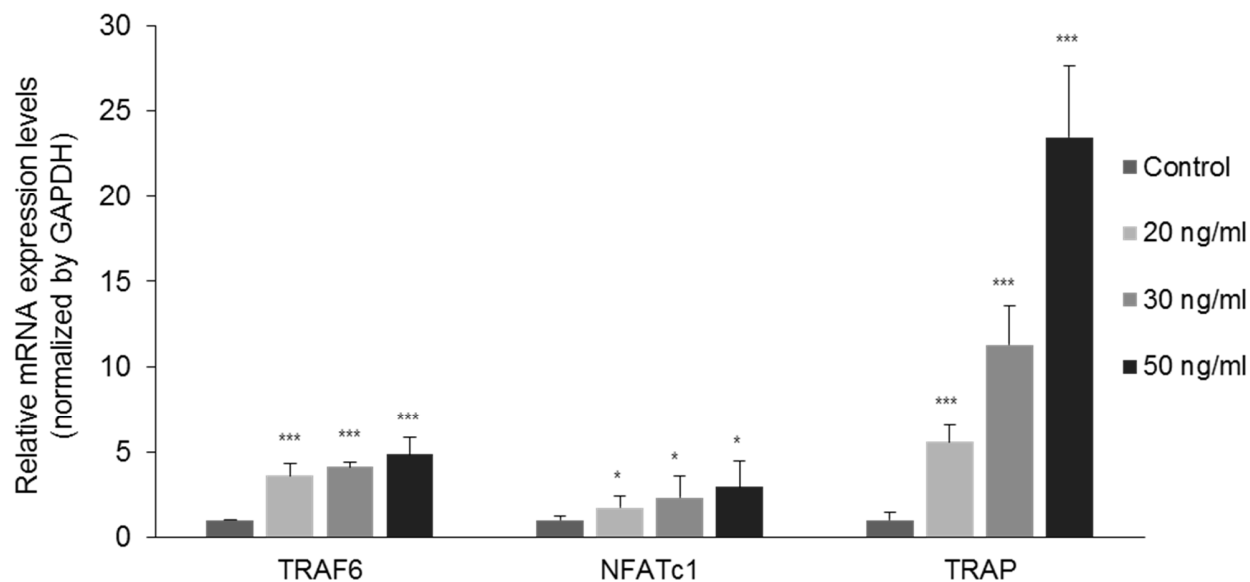

**Figure S1.** qRT-PCR analysis of RANK-RANKL signaling-related gene expression to optimize the concentration of commercial sRANKL. The mRNA expressions of TRAF6, NFATc1, and TRAP were analyzed at day 6 after exposure of commercial sRANKL (20-50 ng/ml) to RAW 264.7 cells. The mRNA levels were normalized by GAPDH expression, and expressed as relative gene expression compared to control. For significance tests, a one-way analysis of variance (ANOVA) followed by Tukey's post-hoc test were used, and expressed as follows; \*P < 0.05, \*\*P < 0.01, \*\*\*P < 0.001.

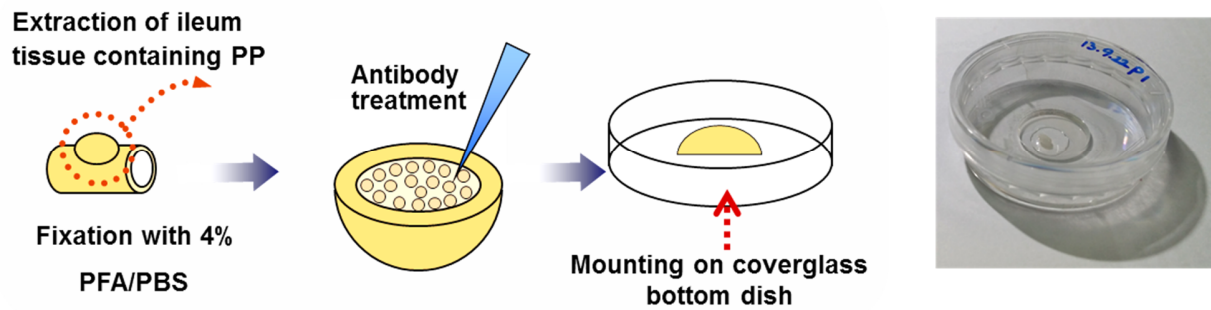

**Figure S2.** Schematic illustration of IHC. Peyer's patches were isolated from small intestine and fixed with 4% (v/v) paraformaldehyde for 2 h at 4°C. The tissues were blocked with 3% goat serum at RT for 1 h and incubated with Alexa488-labeled GP-2 monoclonal antibody (1:400 dilution) at 4°C overnight. The tissues were mounted on coverglass bottom dishes.
